# Supplementary material for: Population Genetics of the Rubber-Producing Russian Dandelion (Taraxacum kok-saghyz)
Source: PLoS One. 2016 Jan 4;11(1):e0146417. doi: 10.1371/journal.pone.0146417 (PMC4703197; doi:10.1371/journal.pone.0146417)
Supplement: S3 Table — Numbers represent allele sizes in base pairs. Missing data is represented by ‘0’. (XLSX) [file pone.0146417.s004.xlsx]

## Sheet: Sheet1
Individual	Population	P1_A5A6		P1_E1E2		P2_G1G2		P3_A1A2		P3_B9B10		P3_C5C6		P3_C7C8		P3_C9C10		P3_E5E6		P3_G11G12		P2_H1H2		P3_G3G4		P3_C11C12		P3_B5B6		P4_A9A10		P4_F5F6		P3_C3C4
35156-10	1	197	199	284	284	168	171	161	161	251	251	178	178	155	155	150	153	166	166	163	166	181	181	0	0	0	0	176	179	179	185	192	192	171	171
35156-11	1	197	197	281	281	168	168	159	163	251	251	178	178	155	163	0	0	166	166	163	166	179	181	0	0	0	0	176	179	182	185	192	201	168	168
35156-13	1	197	197	281	284	162	162	159	161	251	251	178	178	149	161	153	153	160	160	163	163	179	181	0	0	165	168	176	179	185	185	192	192	171	171
35156-14	1	199	199	281	281	168	171	159	159	251	251	178	181	155	155	153	153	166	166	163	166	179	179	0	0	165	165	173	176	185	185	192	192	171	180
35156-15	1	197	197	281	281	162	162	159	163	248	250	0	0	149	163	150	153	154	154	163	163	181	183	0	0	168	168	179	179	176	185	192	192	168	168
35156-2	1	197	197	281	281	0	0	159	161	247	247	178	184	149	149	150	153	166	166	163	166	0	0	172	188	165	165	176	176	185	185	192	192	168	168
35156-4	1	197	199	281	281	162	162	159	161	247	247	178	178	155	163	150	150	166	166	166	166	181	181	172	172	0	0	176	176	185	185	0	0	168	171
35156-5	1	197	199	281	281	150	162	159	161	251	251	178	178	149	155	0	0	163	166	163	166	181	181	172	172	165	168	176	176	185	185	192	192	171	171
35156-6	1	197	199	281	281	0	0	159	159	251	251	178	181	149	155	0	0	166	166	166	166	179	179	172	194	165	165	173	176	185	185	192	192	171	171
35156-8	1	0	0	281	281	0	0	159	161	248	250	178	178	155	155	150	150	163	166	163	166	179	181	172	188	165	168	176	176	176	185	192	192	168	168
35159-12	2	197	199	281	284	171	171	159	161	0	0	178	178	0	0	150	153	166	166	166	166	0	0	172	172	168	168	179	179	176	176	192	192	168	171
35159-15	2	197	197	281	281	162	162	159	159	0	0	0	0	152	155	150	150	163	166	163	166	179	181	172	172	168	168	176	176	182	185	192	192	168	171
35159-17	2	197	199	281	281	171	174	159	163	247	247	178	184	149	152	150	150	163	163	163	166	0	0	172	172	165	168	176	176	176	185	192	198	168	171
35159-20	2	197	199	0	0	0	0	159	161	247	247	178	178	149	155	150	150	160	166	163	163	181	181	172	188	168	168	176	176	182	182	192	204	168	168
35159-22	2	197	199	281	281	162	162	159	159	248	248	178	184	149	156	150	150	163	163	163	163	179	181	172	172	165	168	176	176	176	182	192	204	171	171
35159-6	2	199	199	0	0	0	0	161	161	248	250	178	184	149	152	150	150	160	160	163	166	181	181	194	203	165	168	176	176	182	185	192	192	168	171
35159-7	2	197	199	0	0	0	0	159	163	247	247	178	184	149	155	150	150	166	166	163	163	0	0	172	172	165	168	176	176	176	185	192	192	168	171
35159-9	2	0	0	281	281	159	171	159	159	248	248	178	184	149	152	150	150	166	166	163	166	0	0	188	194	165	168	176	176	176	185	192	198	171	171
35160-1	3	197	197	0	0	150	162	159	159	251	251	178	178	149	155	153	153	166	166	163	166	179	181	0	0	165	165	179	179	176	185	192	192	168	171
35160-10	3	197	199	281	281	168	174	159	159	0	0	178	178	149	149	150	150	166	166	163	163	181	181	172	191	165	168	176	176	185	185	0	0	171	171
35160-12	3	197	197	281	281	162	171	159	159	248	248	178	178	149	163	150	153	166	166	163	166	181	181	172	172	165	165	173	179	185	185	192	192	168	168
35160-13	3	197	197	281	284	162	162	159	159	0	0	178	178	149	155	150	150	163	166	166	166	181	181	172	188	168	168	176	179	176	185	192	192	168	171
35160-14	3	197	197	281	281	150	150	159	159	250	250	178	178	155	161	150	153	163	166	166	166	179	181	172	179	165	168	176	179	185	185	192	192	168	168
35160-15	3	197	197	281	281	162	162	159	159	248	250	178	178	149	155	153	153	163	166	163	163	179	181	172	194	165	165	179	179	0	0	192	192	171	171
35160-17	3	197	199	281	281	162	162	159	159	247	247	178	178	155	164	150	150	154	163	163	166	181	181	172	172	165	165	176	179	185	185	192	192	168	172
35160-18	3	197	197	281	281	0	0	159	159	248	250	178	178	155	155	150	150	163	166	163	163	179	179	172	179	165	165	179	179	185	185	192	192	168	168
35160-2B	3	197	197	281	281	162	162	159	159	248	248	178	178	155	161	153	153	166	166	163	166	179	181	172	179	165	165	179	179	185	185	192	192	168	168
35160-3	3	197	197	281	281	162	162	159	159	250	250	178	178	155	163	150	150	166	166	163	166	179	183	0	0	165	165	173	179	185	185	192	201	168	168
35160-3B	3	197	197	281	281	162	162	159	159	247	247	178	178	155	155	153	153	0	0	163	166	179	181	172	179	165	165	176	179	185	185	0	0	168	168
35160-4	3	197	197	281	284	162	162	159	161	247	247	178	178	149	149	150	153	163	166	163	166	179	181	172	179	165	168	176	179	176	185	192	192	171	171
35160-5	3	197	197	281	281	150	150	159	159	247	251	178	178	149	155	150	150	166	166	163	166	179	179	172	188	165	165	176	176	179	185	192	192	168	168
35160-6	3	197	197	281	281	168	168	159	159	247	247	178	178	149	149	153	153	166	166	163	166	179	179	172	179	165	168	173	179	179	185	192	192	171	171
35160-7	3	199	199	281	281	162	162	159	159	247	247	178	184	155	164	150	153	154	166	163	163	179	181	172	172	165	165	176	176	185	185	192	192	168	171
35160-8	3	197	199	281	281	171	174	159	159	251	251	178	178	155	163	150	150	0	0	163	166	179	183	172	188	165	165	176	179	185	185	192	192	168	168
35162-10	4	197	199	281	281	162	162	159	161	247	247	178	184	149	149	150	153	166	166	163	166	0	0	172	172	165	168	173	173	185	185	192	192	171	171
35162-12	4	197	197	281	281	162	162	159	159	247	247	184	184	149	149	153	153	166	166	163	166	0	0	172	172	168	168	173	179	176	185	192	192	171	171
35162-14	4	197	199	281	281	162	162	159	159	247	247	178	184	149	149	150	153	166	166	163	166	181	181	172	172	165	165	173	173	185	185	192	192	168	171
35162-16	4	197	197	0	0	0	0	159	159	247	247	178	184	149	149	150	153	166	166	163	166	181	181	172	188	165	168	173	179	176	185	192	192	171	171
35162-23	4	199	199	281	281	162	162	159	161	248	248	178	184	149	149	153	153	166	166	163	166	181	181	172	188	168	168	173	173	176	185	192	192	171	171
35162-24	4	197	199	281	281	162	162	159	161	247	247	178	184	149	149	153	153	166	166	163	166	181	181	172	172	165	165	176	179	185	185	192	192	171	171
35162-25	4	197	197	281	281	162	162	159	161	248	248	178	178	149	149	150	153	166	166	163	166	181	181	172	172	168	168	173	173	176	185	192	192	171	171
35162-3	4	197	199	281	281	162	162	161	161	247	247	178	178	149	149	150	153	166	166	0	0	0	0	172	188	165	168	173	173	176	185	0	0	171	171
35162-8	4	199	199	281	281	162	171	159	159	247	247	178	178	149	149	153	153	166	166	166	166	181	181	172	172	165	168	173	176	185	185	192	192	171	171
35164-10	5	197	197	281	281	162	162	159	161	0	0	178	178	0	0	150	150	163	163	163	166	0	0	172	188	165	168	173	176	176	185	192	201	168	171
35164-12	5	197	197	281	281	162	162	159	161	247	247	178	178	149	149	150	153	163	166	166	166	179	181	172	172	165	168	173	176	176	185	192	198	168	171
35164-15	5	197	197	281	281	165	165	163	163	247	250	178	184	155	155	150	150	163	166	163	163	179	181	0	0	165	165	176	176	185	185	192	192	171	171
35164-1A	5	197	197	281	281	171	171	159	161	250	250	178	184	155	161	150	150	166	166	163	166	179	181	172	172	165	168	176	176	182	185	192	192	168	171
35164-2	5	197	197	281	281	162	162	159	159	247	248	178	184	149	155	150	150	166	166	163	163	179	181	185	188	165	168	176	176	176	182	192	192	168	171
35164-22	5	197	197	281	281	162	162	159	161	248	248	0	0	149	149	150	153	166	166	163	166	179	181	172	185	165	165	176	176	185	185	192	201	171	171
35164-23	5	197	197	281	281	168	171	161	163	251	251	178	184	155	155	150	153	166	166	163	166	179	181	172	188	165	165	176	179	176	185	192	198	171	171
35164-24	5	197	199	281	281	162	162	159	163	249	252	178	184	149	162	150	150	166	166	166	166	181	181	172	188	168	168	176	176	176	182	192	192	0	0
35164-5	5	197	197	281	281	168	168	159	159	250	250	178	184	149	163	150	150	166	166	163	166	179	181	172	185	165	165	173	176	176	185	192	192	168	171
35166-1	6	195	197	281	281	171	174	159	161	247	251	178	184	149	155	150	150	166	166	163	163	179	181	172	194	165	165	173	176	176	185	192	192	171	171
35166-10	6	195	197	281	281	150	162	161	161	251	251	178	184	149	158	150	150	166	166	163	163	179	181	172	172	165	168	176	176	176	185	192	192	171	171
35166-12	6	199	199	281	281	0	0	159	159	251	251	178	178	149	161	150	153	166	166	163	163	179	181	0	0	168	168	176	176	185	185	192	192	171	171
35166-16	6	199	199	281	284	162	162	159	159	247	247	178	178	149	155	153	153	163	166	166	166	179	181	172	172	165	168	176	179	185	185	192	192	171	171
35166-17	6	195	197	281	281	162	162	159	161	247	251	178	178	155	161	150	150	166	166	163	163	179	181	172	172	165	165	176	176	185	185	192	192	171	171
35166-20	6	195	197	281	281	171	171	159	159	251	251	178	178	161	161	153	153	166	166	163	163	181	181	172	172	168	168	176	176	176	185	192	192	171	171
35166-21	6	195	197	281	281	162	162	159	159	252	252	178	178	149	149	150	153	166	166	163	163	179	181	172	172	165	165	176	176	176	185	192	192	171	171
35166-4	6	199	199	281	284	162	162	159	159	251	251	178	178	149	149	150	153	163	166	163	166	179	181	172	172	165	165	173	176	176	185	192	192	168	171
35166-5	6	0	0	281	281	162	162	159	161	251	251	178	178	149	149	150	153	163	166	163	166	0	0	172	172	0	0	173	179	185	185	192	192	168	171
35166-8	6	199	199	281	284	150	162	159	159	248	251	178	178	149	149	150	153	163	166	163	163	179	181	172	172	165	165	176	176	185	185	192	192	168	171
35168-1	7	197	197	281	281	162	162	159	159	247	247	178	178	149	155	150	150	166	166	166	166	179	181	0	0	165	165	173	176	185	185	192	192	168	171
35168-10	7	197	199	281	281	162	162	159	161	247	247	178	178	149	155	150	153	166	166	163	163	181	181	172	188	165	165	176	176	185	185	192	192	168	168
35168-11	7	197	197	281	281	165	171	159	159	247	247	178	178	149	155	150	153	163	163	163	166	179	181	172	172	165	165	176	179	176	176	192	201	168	171
35168-12	7	197	197	281	281	162	162	159	159	250	250	178	184	149	149	143	150	163	166	163	166	181	181	172	172	165	171	179	179	176	179	192	201	168	171
35168-13	7	199	199	281	281	159	171	159	161	247	247	178	178	149	155	150	153	163	166	163	166	181	181	179	188	165	168	176	179	185	185	192	192	168	168
35168-15	7	197	199	281	281	162	162	159	159	247	247	178	184	149	163	141	150	160	160	163	163	179	181	172	172	165	165	176	176	176	185	192	192	168	171
35168-2	7	199	199	0	0	162	162	159	163	247	251	178	178	155	155	143	150	166	166	163	163	179	181	172	179	168	168	176	176	179	185	192	192	168	171
35168-4	7	197	197	281	281	162	162	159	159	247	247	178	178	149	149	150	153	154	154	166	166	179	181	172	172	165	165	173	173	176	185	192	192	168	171
35168-5	7	197	197	281	281	162	162	159	159	248	250	178	184	161	161	150	153	166	166	163	166	179	179	172	179	165	165	179	179	176	176	192	192	168	168
35168-8	7	197	197	281	281	0	0	159	159	251	251	184	184	149	149	150	150	166	166	163	166	179	181	172	179	165	168	176	179	176	185	192	192	168	171
35168-9	7	197	197	281	281	162	162	159	159	247	247	178	184	149	149	150	153	163	163	163	166	179	181	172	200	165	165	176	179	176	185	192	192	168	168
35169-1	8	197	197	281	281	150	162	161	161	247	247	178	178	163	163	153	153	166	166	163	163	179	179	172	188	165	165	179	179	176	185	192	192	168	168
35169-10	8	199	199	281	281	168	171	159	159	251	251	178	178	155	161	150	150	166	166	163	166	179	181	172	194	165	165	176	176	185	185	192	192	171	171
35169-11	8	197	199	281	281	162	162	159	159	251	251	178	178	155	155	141	150	166	166	163	166	181	181	172	179	165	165	176	176	185	185	192	201	168	171
35169-13	8	189	197	0	0	0	0	159	159	251	251	178	178	149	155	150	150	166	166	166	166	181	181	0	0	165	165	176	179	182	185	192	192	168	168
35169-15	8	197	197	0	0	162	162	159	161	251	251	178	178	155	155	150	150	166	166	163	166	179	181	188	191	165	165	176	176	182	185	192	192	168	171
35169-16	8	197	197	281	281	168	171	159	159	251	251	178	178	155	155	150	153	166	166	166	166	179	179	172	194	165	168	176	176	176	185	192	192	171	171
35169-17	8	197	197	281	281	168	171	159	161	247	247	0	0	149	155	150	153	166	166	166	166	179	179	172	172	165	168	0	0	176	185	192	192	168	168
35169-19	8	199	203	281	281	165	165	159	159	248	251	178	178	155	155	150	153	163	166	163	166	179	181	172	172	165	165	176	179	185	185	192	204	171	171
35169-2	8	197	197	281	281	162	162	159	159	0	0	178	184	0	0	150	150	166	166	163	166	168	181	172	191	165	168	179	179	185	185	192	201	171	171
35169-6	8	197	199	281	281	168	174	161	161	247	247	178	178	155	155	150	150	166	166	163	166	179	179	179	191	165	165	176	179	185	185	192	192	168	168
35169-7	8	197	197	281	281	162	162	161	161	247	248	178	178	149	149	150	153	166	166	163	166	179	181	172	188	165	168	173	176	185	185	201	201	168	168
35169-8	8	197	199	281	281	162	162	159	161	251	251	178	178	149	155	150	150	166	166	166	166	181	181	179	188	165	165	176	176	0	0	192	201	171	171
35170-1	9	199	203	281	284	162	162	159	163	251	251	178	178	149	149	150	150	154	166	163	166	181	181	172	200	165	165	176	179	176	185	192	192	168	168
35170-10	9	197	199	281	281	168	168	159	161	0	0	178	178	155	155	150	150	166	166	163	166	179	179	172	188	165	168	176	179	185	185	192	192	168	168
35170-11	9	199	199	281	281	162	162	159	159	247	247	178	178	149	149	150	150	166	166	163	166	179	179	172	172	165	165	173	176	176	176	192	192	168	171
35170-12	9	197	197	281	281	0	0	159	161	250	250	178	178	0	0	150	150	163	166	166	166	179	181	172	172	0	0	176	176	185	185	192	201	171	171
35170-13	9	0	0	281	281	162	162	159	159	248	248	178	184	149	149	150	150	166	166	163	166	179	181	172	172	165	165	173	179	185	185	192	192	168	171
35170-14	9	197	197	281	281	162	162	159	161	248	251	178	178	149	155	150	150	166	166	166	166	179	181	172	172	165	165	176	179	185	185	192	192	168	171
35170-15	9	197	197	281	281	162	162	159	159	251	251	178	178	155	164	150	150	166	166	163	166	179	179	172	172	165	165	176	176	176	185	192	201	168	171
35170-18	9	197	203	281	281	162	162	159	161	248	251	178	178	149	149	150	150	166	166	166	166	181	181	172	172	165	168	176	179	182	185	192	192	168	171
35170-3	9	199	203	0	0	0	0	159	159	247	247	178	178	149	149	150	150	166	166	163	163	0	0	172	172	165	165	173	179	176	182	192	192	168	171
35170-4	9	199	199	281	284	162	162	159	161	247	251	178	178	149	155	150	153	166	166	166	166	179	181	172	188	168	168	176	176	185	185	192	201	168	171
35170-7	9	197	199	281	281	162	162	159	159	247	247	184	184	0	0	153	153	166	166	163	166	179	179	172	172	165	165	176	176	185	185	192	192	171	171
35170-9	9	197	199	281	281	162	162	159	159	248	248	178	178	149	149	150	150	166	166	166	166	168	179	172	172	165	168	179	179	185	185	0	0	171	171
35172-10	10	199	199	281	281	162	162	159	159	248	251	178	178	149	155	150	153	166	166	166	166	179	181	172	172	168	168	176	176	185	185	192	192	168	171
35172-13	10	199	199	281	281	162	162	159	159	247	247	178	184	149	155	150	150	163	166	163	166	179	181	172	194	165	168	179	179	182	185	192	192	171	171
35172-14	10	197	197	281	284	162	162	161	163	0	0	178	178	141	149	150	150	154	166	163	166	179	181	194	194	168	168	176	179	176	185	192	201	171	171
35172-14B	10	195	197	281	281	158	162	0	0	0	0	178	184	149	149	150	153	163	166	163	166	0	0	172	172	168	168	179	179	182	185	192	192	171	171
35172-15	10	197	197	281	281	168	168	163	163	0	0	178	178	155	163	150	153	166	166	163	163	0	0	172	172	165	165	176	176	182	185	0	0	171	171
35172-21	10	197	197	281	281	162	162	159	159	248	248	178	178	149	164	150	150	166	166	166	166	168	181	172	172	165	165	173	176	185	185	192	192	168	168
35172-6	10	197	197	281	281	162	162	159	159	0	0	178	178	149	152	150	153	166	166	163	166	179	181	172	191	165	168	176	179	182	185	0	0	171	171
35173-11	11	0	0	281	281	162	162	159	159	247	251	178	184	149	149	153	153	163	169	163	163	179	181	172	200	165	168	176	179	185	185	192	192	168	171
35173-13	11	199	199	281	281	168	171	159	163	251	251	178	178	149	149	150	153	163	166	163	163	0	0	179	194	165	168	179	179	176	185	192	192	171	171
35173-2	11	197	199	281	281	150	150	159	159	251	251	178	178	152	155	153	153	163	166	163	163	181	183	172	172	165	165	173	176	176	185	192	192	168	171
35173-24	11	195	197	281	281	162	162	159	159	248	252	178	184	149	149	150	150	166	169	163	163	179	181	172	172	165	165	176	176	176	185	192	192	168	171
35173-25	11	197	197	281	281	168	174	161	161	252	252	178	178	149	149	150	150	166	166	163	163	179	181	172	191	165	168	176	179	182	185	192	192	168	168
35173-28	11	197	197	281	281	150	150	159	159	252	252	178	184	149	155	150	150	163	169	163	166	181	181	172	188	165	168	173	176	185	185	192	192	168	171
35173-29	11	197	199	281	281	150	150	159	163	249	249	178	178	149	149	150	153	166	166	163	166	179	181	188	191	165	168	173	179	182	185	192	192	168	171
35173-4	11	197	197	281	281	162	162	159	159	0	0	178	184	149	149	150	150	163	166	163	166	179	179	172	200	165	165	176	176	185	185	192	192	171	171
35173-5	11	199	199	281	281	162	162	159	159	251	251	178	184	149	149	150	150	166	166	163	166	181	181	172	172	165	168	173	176	182	185	192	192	168	168
35173-9	11	197	197	281	281	162	162	159	159	251	251	178	178	149	149	150	150	166	166	163	163	0	0	172	191	165	165	176	179	176	185	192	201	168	171
35176-1	12	199	199	281	281	162	162	159	161	248	248	0	0	155	155	150	150	166	166	163	166	181	181	172	194	165	165	176	176	176	185	192	192	168	168
35176-10	12	199	199	281	281	162	162	159	163	247	247	178	178	0	0	150	153	166	166	163	166	179	179	172	172	165	165	176	176	185	185	192	201	171	171
35176-11	12	199	199	281	281	162	162	159	163	247	251	178	178	149	155	150	150	163	163	163	166	179	181	172	185	168	168	173	179	185	185	192	192	171	171
35176-12	12	199	199	281	281	168	171	159	161	247	247	178	184	155	163	150	150	163	166	163	166	179	181	172	194	165	168	176	176	185	185	192	201	168	171
35176-21	12	197	199	281	281	168	171	159	163	248	248	178	184	149	149	0	0	166	166	166	166	181	181	172	179	165	168	176	179	185	185	192	192	171	171
35176-22	12	197	197	281	281	162	162	159	159	247	247	178	178	149	149	150	153	166	166	166	166	179	181	172	172	165	168	0	0	185	185	192	192	0	0
35176-3	12	197	199	281	281	162	162	161	161	247	247	178	178	155	163	150	150	154	166	166	166	0	0	179	194	165	168	173	176	185	185	192	201	168	171
35176-5A	12	195	197	281	281	162	162	159	159	247	247	178	178	149	152	150	153	166	166	166	166	168	179	172	185	165	165	176	179	176	185	192	192	171	171
35176-5B	12	197	197	281	281	162	162	159	159	251	251	178	178	149	149	153	153	166	166	166	166	0	0	172	188	165	168	173	179	182	185	192	192	168	171
35176-6	12	197	197	281	281	162	162	159	159	248	248	178	178	155	155	150	150	163	166	163	166	179	181	172	172	168	168	176	176	185	185	0	0	171	171
35176-9	12	197	199	281	281	162	162	161	161	247	247	178	184	155	163	150	150	163	166	163	163	181	181	0	0	168	168	176	176	185	185	192	192	168	168
35178-1	13	0	0	281	281	162	162	161	161	247	251	178	181	149	155	0	0	166	166	163	163	181	183	172	172	0	0	176	179	185	185	192	201	168	171
35178-12	13	197	197	281	281	162	162	159	159	247	251	178	184	149	155	150	153	154	166	163	166	179	179	172	188	165	168	176	176	176	182	192	192	171	171
35178-2	13	0	0	281	281	162	162	159	159	251	251	178	178	149	155	0	0	154	163	163	163	179	179	0	0	168	171	176	176	185	185	192	192	168	171
35178-24	13	197	197	281	281	168	174	159	159	252	252	178	178	149	155	150	150	166	166	163	163	179	183	172	188	165	165	176	176	182	185	192	192	171	171
35178-6	13	197	197	281	281	168	168	161	163	248	248	178	178	149	149	150	153	154	163	163	163	179	181	172	179	165	165	176	179	179	185	192	192	168	171
35178-7	13	197	199	281	281	162	162	159	159	251	251	178	178	149	155	150	150	154	154	163	166	179	181	188	188	165	165	173	176	182	185	192	201	171	171
35178-9	13	197	197	281	281	162	162	159	159	251	251	178	178	155	155	153	153	163	163	163	166	179	179	172	172	165	165	173	176	185	185	192	192	168	171
35179-11	14	197	197	281	281	165	171	159	161	247	247	178	184	149	155	150	150	166	166	163	166	179	179	172	172	165	165	179	179	185	185	192	192	171	171
35179-2	14	197	199	281	281	162	162	159	161	247	247	178	178	155	163	150	150	166	166	166	166	181	181	172	172	165	165	176	176	185	185	192	192	168	171
35179-21	14	197	197	281	281	162	162	159	161	248	248	178	178	149	152	150	150	166	166	163	166	181	181	172	172	165	165	173	176	176	185	192	201	171	171
35179-22	14	197	197	281	281	162	162	161	161	251	251	178	178	149	152	150	150	166	166	166	166	181	181	172	172	165	165	173	176	185	185	192	192	171	171
35179-23	14	197	197	281	281	162	165	161	161	248	248	178	178	149	152	150	150	166	166	166	166	179	181	172	172	165	165	176	176	185	185	192	192	171	174
35179-4	14	197	197	281	281	162	162	159	159	247	247	178	178	149	155	150	150	163	166	163	166	179	179	172	203	165	168	176	179	185	185	192	192	168	168
35179-4B	14	197	197	281	281	165	171	159	161	247	247	178	178	149	155	150	150	166	166	166	166	179	179	172	172	165	165	179	179	185	185	192	201	171	171
35179-6	14	197	199	281	281	162	165	159	161	248	248	178	178	149	155	150	150	166	166	166	166	179	179	172	172	165	165	176	179	185	185	0	0	171	171
35179-7	14	197	197	281	281	162	162	159	159	248	248	178	178	149	149	150	150	166	166	163	163	0	0	172	185	165	165	176	179	182	182	0	0	168	171
35179-8	14	197	197	281	281	162	162	159	161	247	248	178	178	149	149	150	153	166	166	163	166	0	0	172	172	165	165	176	176	182	185	192	192	168	171
35179-9	14	197	199	281	281	162	165	159	159	248	248	178	178	152	155	150	150	163	166	166	166	179	181	172	172	165	168	176	176	185	185	192	201	171	171
35181-12	15	195	197	281	281	162	162	159	165	247	251	178	184	149	149	153	153	166	166	166	166	179	179	172	172	165	165	173	176	176	185	192	192	171	171
35181-2	15	199	199	281	284	162	162	161	161	247	247	178	178	163	163	150	153	154	166	163	163	0	0	172	172	165	168	176	176	185	185	192	201	171	171
35181-21	15	197	197	0	0	162	162	159	159	247	251	178	178	149	155	150	150	166	166	163	163	181	181	172	172	165	168	173	173	185	185	192	192	168	171
35181-22	15	197	199	281	281	162	162	159	159	251	251	178	178	149	155	143	150	166	166	166	166	181	181	172	172	165	168	179	179	176	185	192	192	171	171
35181-23	15	197	199	281	281	162	162	159	161	248	252	178	184	149	159	143	150	154	163	163	166	168	179	179	188	165	165	173	179	176	185	192	201	171	171
35181-24	15	197	197	281	281	162	162	159	159	247	247	178	184	149	162	150	150	163	166	163	166	179	181	172	172	165	168	176	176	176	185	192	192	171	171
35181-25	15	195	197	281	284	162	162	161	161	247	247	178	178	149	162	150	153	163	166	163	163	179	179	172	188	168	168	176	179	176	185	192	192	168	171
35181-27	15	197	197	281	281	162	162	159	159	247	247	178	178	149	162	0	0	166	166	166	166	168	181	172	179	165	168	173	176	185	185	0	0	168	168
35181-8	15	197	197	281	281	162	162	159	159	247	251	178	178	149	161	150	153	166	166	163	166	168	179	172	179	165	168	176	179	176	185	192	192	168	171
35181-9	15	199	199	281	284	162	162	161	161	247	247	178	178	149	149	150	150	163	166	163	163	179	181	172	172	168	168	176	179	176	185	192	192	168	171
35182-15	16	197	197	281	281	162	162	161	161	247	251	178	178	149	149	150	153	166	166	166	166	179	181	172	172	0	0	0	0	176	185	0	0	171	171
35182-16	16	197	197	281	281	168	171	159	161	251	251	178	178	149	155	150	150	154	166	166	166	179	181	172	185	165	168	176	176	176	182	0	0	171	171
35182-17	16	197	197	281	284	150	150	159	161	247	247	178	178	149	163	150	150	163	166	163	166	181	183	172	185	165	165	176	176	176	185	192	201	168	180
35182-21	16	197	197	281	281	162	162	159	161	248	248	178	178	155	155	150	150	166	166	163	166	179	179	172	172	165	165	176	179	176	182	192	192	171	171
35182-25	16	197	197	281	281	168	171	159	163	247	251	178	178	149	149	150	150	166	166	166	166	179	179	172	185	168	168	176	176	182	185	192	192	171	171
35182-26	16	195	197	281	281	162	162	159	159	247	251	178	178	149	156	150	150	166	166	163	166	179	181	172	185	168	168	176	179	185	185	192	192	171	171
35182-27	16	195	199	281	284	162	162	159	161	247	247	178	178	149	149	150	150	166	166	166	166	179	179	172	185	165	168	176	176	176	182	192	192	171	171
35182-3	16	197	197	281	281	162	162	159	161	247	247	178	178	149	155	150	150	166	166	163	163	0	0	172	191	165	165	176	179	182	185	192	192	171	171
35182-4	16	197	197	281	281	162	162	159	159	247	247	178	178	149	149	150	153	166	166	163	163	181	181	185	191	165	165	176	179	176	185	0	0	171	171
35182-9	16	197	197	281	281	162	162	159	159	247	247	0	0	149	164	150	150	166	166	163	166	0	0	172	172	165	168	176	176	176	176	192	201	171	180
Kaz-10-10	17	195	197	281	281	162	162	159	163	248	248	184	184	149	158	150	153	166	166	0	0	179	179	172	172	165	168	176	176	176	185	0	0	168	171
Kaz-10-11	17	197	199	281	281	171	174	159	159	247	247	178	178	155	163	0	0	166	166	163	163	0	0	172	188	168	168	176	179	182	185	192	192	168	171
Kaz-10-12	17	197	197	281	281	162	162	159	163	251	251	181	184	149	155	150	153	166	166	163	166	179	181	172	172	165	168	176	176	185	185	192	192	168	171
Kaz-10-14	17	197	197	281	281	162	162	159	161	0	0	178	184	149	155	150	153	166	166	163	163	179	179	172	172	165	168	176	176	185	185	192	192	171	171
Kaz-10-15	17	203	203	281	281	168	171	159	163	248	248	178	184	155	155	150	153	163	166	163	166	0	0	172	172	165	165	176	176	185	185	192	192	168	171
Kaz-10-16	17	199	199	281	281	162	162	159	159	247	247	178	184	155	155	153	153	154	166	163	166	179	179	172	172	165	168	176	179	182	185	192	192	171	171
Kaz-10-3	17	197	197	281	281	162	162	159	159	248	249	178	178	149	149	150	153	166	166	163	163	179	181	172	194	165	168	176	176	185	185	192	192	168	171
Kaz-10-4	17	197	197	281	281	150	174	159	163	248	248	178	184	149	158	150	150	0	0	163	163	181	181	172	172	165	165	176	176	176	185	192	192	168	171
Kaz-10-5	17	197	197	281	281	162	162	159	163	248	248	178	184	158	161	150	150	166	166	163	166	179	179	172	172	165	168	176	176	176	185	192	192	168	171
Kaz-10-6	17	197	197	281	281	162	162	159	159	248	248	178	178	149	149	146	153	166	166	163	163	179	179	172	194	165	165	176	179	182	185	192	201	171	171
Kaz-10-7	17	197	197	281	281	162	162	159	159	248	248	178	178	149	149	153	153	166	166	163	166	181	181	172	194	165	168	176	176	182	185	192	192	168	171
Kaz-10-8	17	197	197	281	281	158	162	159	159	247	247	184	184	149	161	150	153	166	166	163	166	179	179	172	172	168	168	176	179	185	185	192	201	168	171
Kaz-10-9	17	195	197	281	281	162	162	159	159	248	248	178	184	155	155	150	153	166	166	166	166	0	0	172	172	165	168	176	176	176	185	192	192	168	171
* Note Kaz-10 = Population 35165
